# Supplementary material for: Ingestion of artificial sweeteners leads to caloric frustration memory in Drosophila
Source: PubMed Central journal article supplement (PMC5703724; doi:10.1038/s41467-017-01989-0), 2017-11-27
Supplement: 41467_2017_1989_MOESM1_ESM.pdf [file 41467_2017_1989_MOESM1_ESM.pdf]

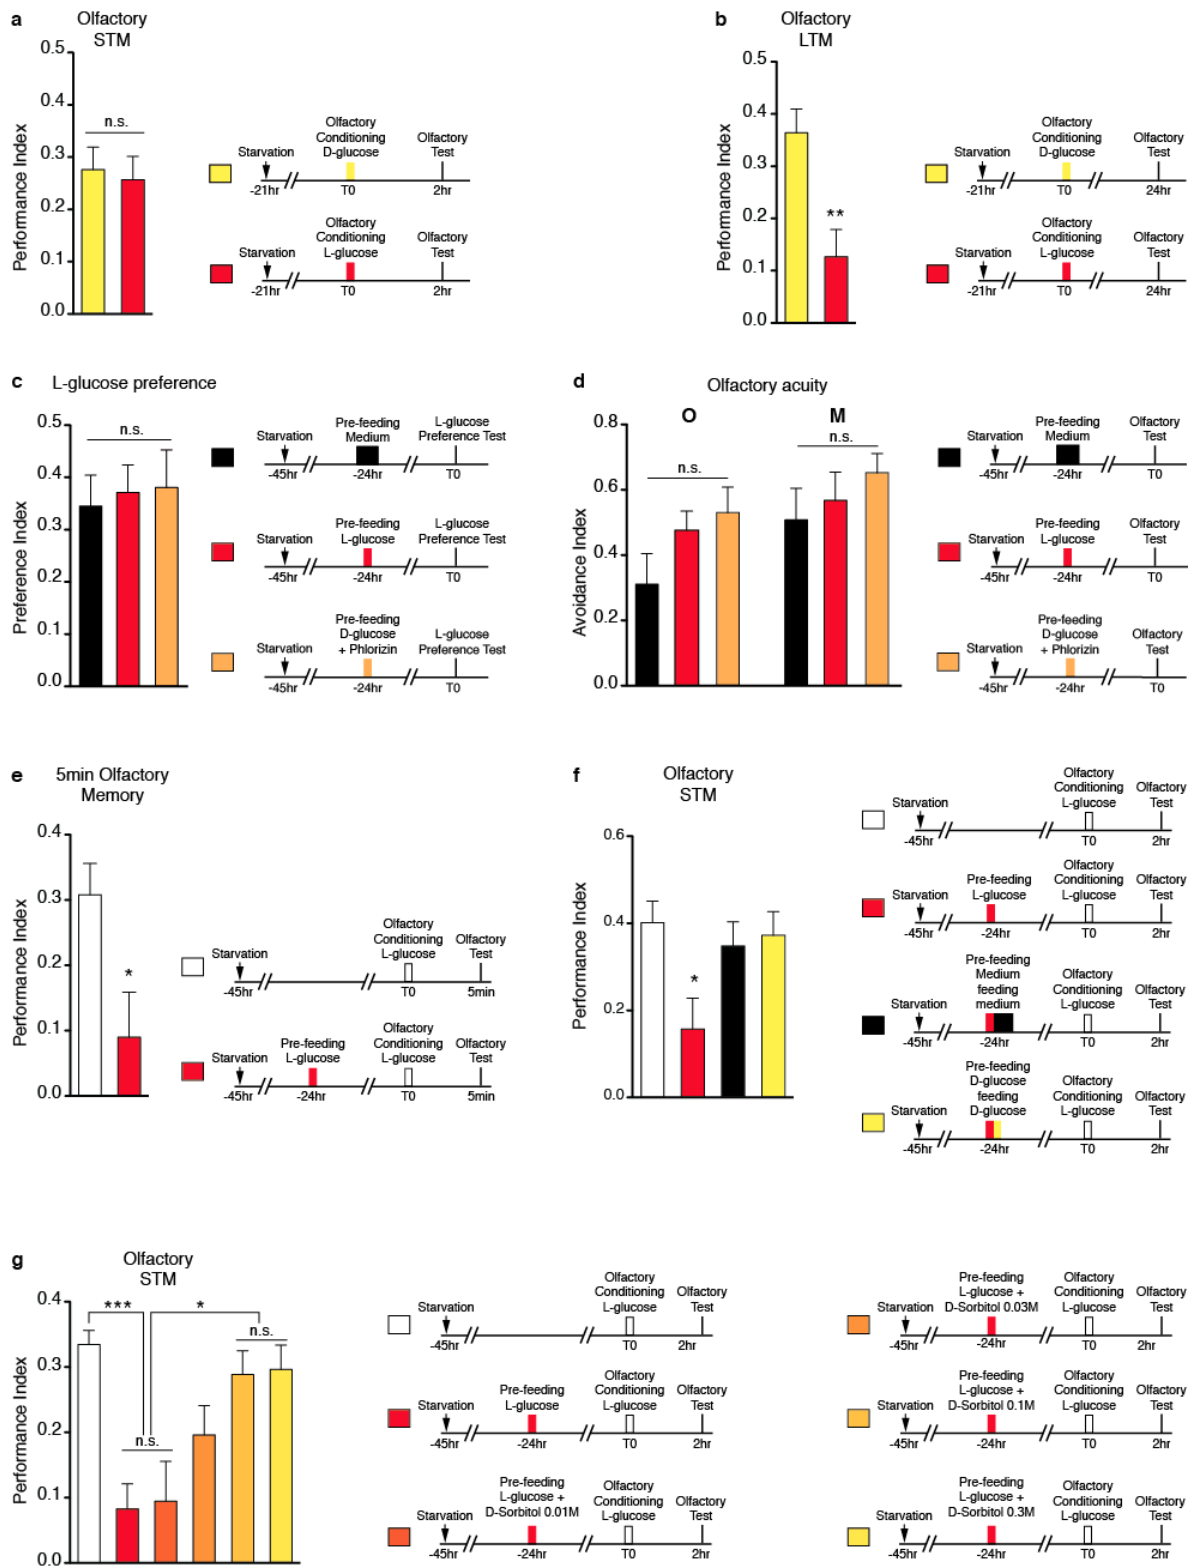

**Supplementary Figure 1: Energy is required for LTM formation.** **a** Flies conditioned on either L- or D-glucose display similar olfactory memory scores 2 hr after training ( $t$ -test,  $t_{28} = 0.311$ ;  $p = 0.757$ ;  $n = 15$ ). **b** Flies conditioned on energetic D-glucose display higher olfactory long-term memory scores than L-glucose conditioned flies ( $t$ -test,  $t_{31} = 3.440$ ;  $p = 0.001$ ;  $n = 15$ ). **c** Pre-feeding flies with L-glucose or a mixture of D-glucose + phlorizin 24 hr before an L-glucose preference test does not affect sugar preference in comparison to flies pre-fed with medium ( $F_{(2,49)} = 0.09$ ;  $p = 0.913$ ;  $n \geq 16$ ). **d** Normal

olfactory acuity was observed in flies pre-fed with regular medium, L-glucose, or a mixture of D-glucose + phlorizin in response to octanol ( $F_{(2,41)} = 2.173, p = 0.127, n = 14$ ) and methylcyclohexanol ( $F_{(2,41)} = 0.773, p = 0.468, n = 14$ ). **e** Flies pre-fed and conditioned with L-glucose display a significantly lower memory score as compared to non-pre-fed flies, when the olfactory memory test is performed 5 min after training ( $t$ -test,  $t_{17} = 2.636; p = 0.017; n \geq 9$ ). **f** Both non-pre-fed flies and flies pre-fed with L-glucose and re-fed on D-glucose or classical medium displayed significantly higher STM scores as compared to L-glucose pre-fed flies ( $F_{(3,46)} = 3.445; p = 0.248; n \geq 10$ ). **g** Complementing L-glucose pre-feeding with increasing concentrations of energetic but tasteless D-sorbitol progressively inhibits CFM formation ( $F_{(6,161)} = 8.6; p < 0.0001; n \geq 18; p > 0.999$  in *post-hoc* comparison between flies pre-fed with L-glucose and flies pre-fed with L-glucose and D-sorbitol 0.01M,  $p > 0.999$  in *post-hoc* comparison between flies pre-fed with L-glucose and D-sorbitol 0.1M and flies pre-fed with L-glucose and D-sorbitol 0.3M). Means are  $\pm$  SEM; statistical tests:  $t$ -test and one-way ANOVA; n.s.:  $p \geq 0.05$ ; \* $p < 0.05$ ; \*\* $p < 0.01$ ; \*\*\* $p < 0.001$  in comparison between two groups for  $t$ -test and in post hoc comparisons with other groups for ANOVA.

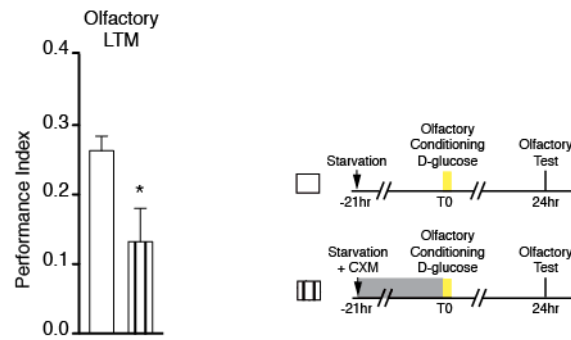

**Supplementary Figure 2: Twenty-four-hour memory formed after conditioning with D-glucose is protein synthesis-dependent.** Treating flies with cycloheximide protein synthesis inhibitor (CXM) impairs 24-hr memory in flies conditioned with D-glucose ( $t$ -test,  $t_{37} = 2.446$ ;  $p = 0.019$ ;  $n \geq 19$ ). Means are  $\pm$  SEM; statistical test:  $t$ -test; n.s.:  $p \geq 0.05$ ; \* $p < 0.05$ ; in comparison between two groups.

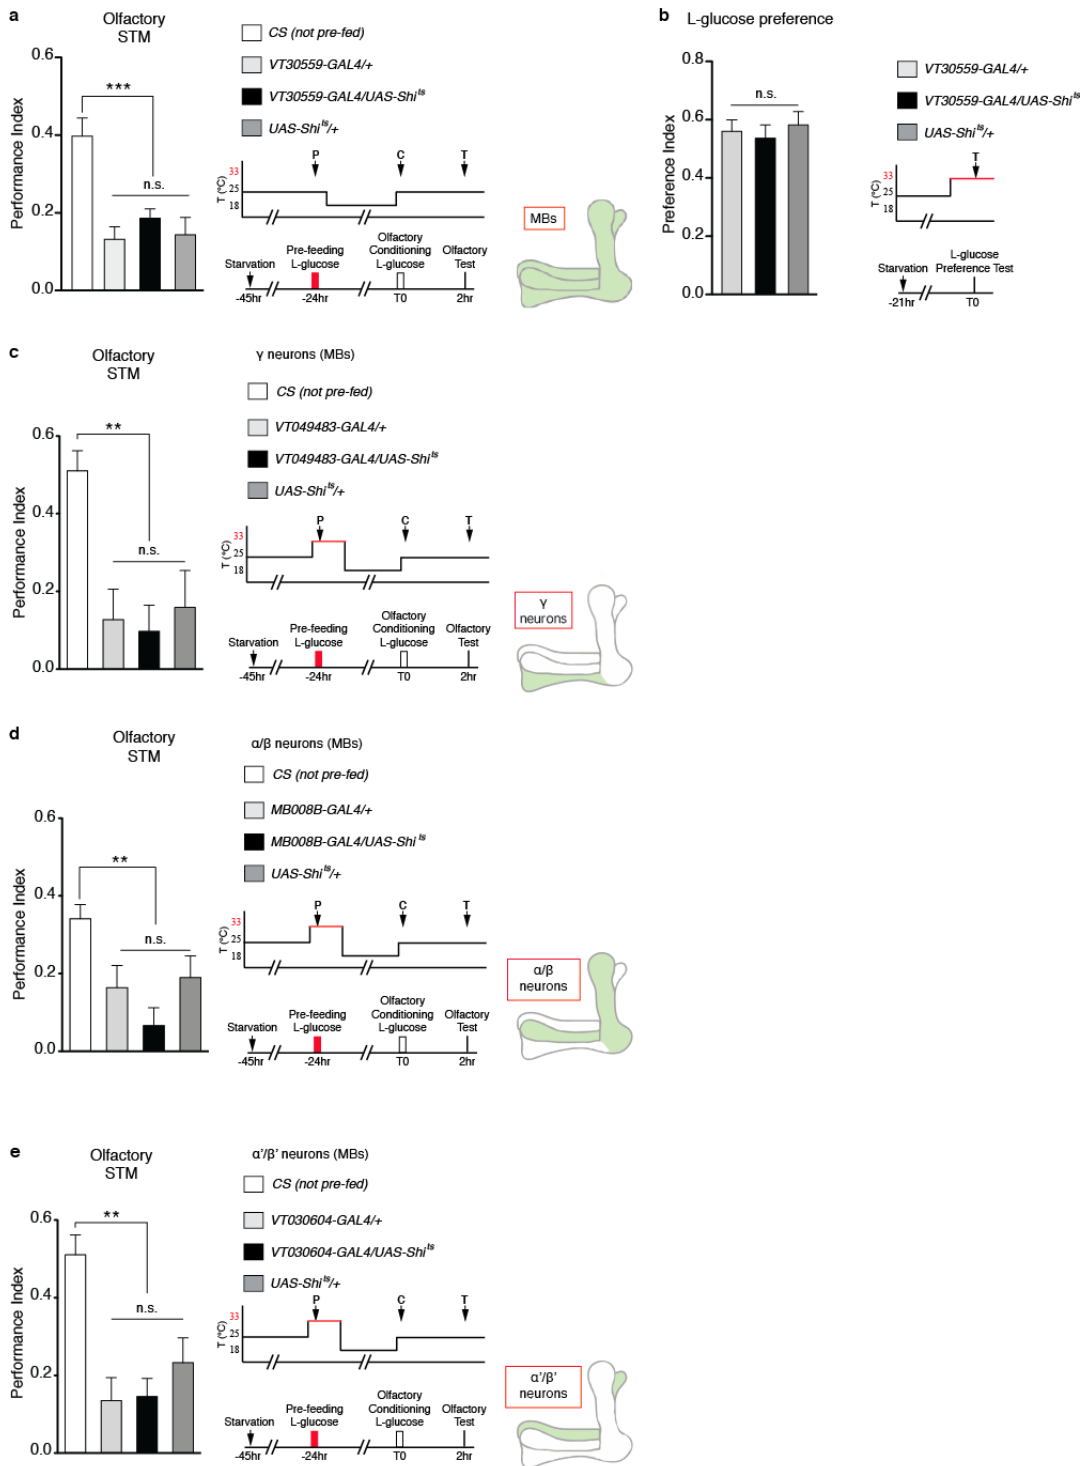

**Supplementary Figure 3: Unlike inhibition of the complete MB, inhibiting a sub-population of MB neurons does not impair CFM.** **a**  $Shi^{ts}$  expression in MB neurons under VT30559-GAL4 does not impair CFM at the permissive temperature ( $F_{(3,63)} = 8.966$ ;  $p < 0.001$ ;  $n \geq 15$ ;  $p = 0.708$  in *post-hoc* comparison between  $UAS-Shi^{ts}/+$  and  $VT30559-GAL4/UAS-Shi^{ts}$ ,  $p = 0.996$  in *post-hoc* comparison between  $UAS-Shi^{ts}/+$  and  $VT30559-GAL4/+$ ,  $p = 0.846$  in *post-hoc* comparison between  $VT30559-GAL4/UAS-Shi^{ts}$  and  $VT30559-GAL4/+$ ). **b** At the restrictive temperature, the L-glucose response of flies expressing  $Shi^{ts}$  in MB neurons does not differ from controls ( $F_{(2,71)} = 0.273$ ;  $p > 0.05$ ;  $n = 24$ ). **c** Blocking MB  $\gamma$  neurons with VT049483-GAL4 during and after L-glucose pre-feeding does not abolish CFM ( $F_{(3,39)} = 8.559$ ;  $p = 0.0002$ ;  $n \geq 8$ ;  $p = 0.990$  in *post-hoc* comparison between  $VT49483-GAL4/+$  and  $VT49483-GAL4/UAS-Shi^{ts}$ ,  $p = 0.991$  in *post-hoc* comparison between  $UAS-Shi^{ts}/+$  and  $VT49483-GAL4/+$ ,  $p = 0.933$  in *post-*

*hoc* comparison between *VT49483-GAL4/UAS-Shi<sup>ts</sup>* and *UAS-Shi<sup>ts</sup>/+*). **d** Blocking MB  $\alpha/\beta$  neurons with *MB008B-GAL4* during and after L-glucose pre-feeding does not abolish CFM ( $F_{(3,48)} = 6.962$ ;  $p < 0.0001$ ;  $n \geq 10$ ;  $p = 0.528$  in *post-hoc* comparison between *MB008B-GAL4/+* and *MB008B-GAL4/UAS-Shi<sup>ts</sup>*,  $p = 0.322$  in *post-hoc* comparison between *UAS-Shi<sup>ts</sup>/+* and *MB008B-GAL4/UAS-Shi<sup>ts</sup>*,  $p = 0.984$  in *post-hoc* comparison between *MB008B-GAL4/+* and *UAS-Shi<sup>ts</sup>/+*). **e** Blocking MB  $\alpha'/\beta'$  neurons with *VT030604-GAL4* during after L-glucose pre-feeding does not abolish CFM ( $F_{(3,31)} = 12.15$ ;  $p < 0.0001$ ;  $n \geq 6$ ;  $p = 0.999$  in *post-hoc* comparison between *VT30604-GAL4/+* and *VT30604-GAL4/UAS-Shi<sup>ts</sup>*,  $p = 0.688$  in *post-hoc* comparison between *UAS-Shi<sup>ts</sup>/+* and *VT30604-GAL4/+*,  $p = 0.754$  in *post-hoc* comparison between *VT30604-GAL4/UAS-Shi<sup>ts</sup>* and *UAS-Shi<sup>ts</sup>/+*). Means are  $\pm$  SEM; one-way ANOVA; n.s.:  $p \geq 0.05$ ; \*\* $p < 0.001$  in *post hoc* comparisons with both parental controls.

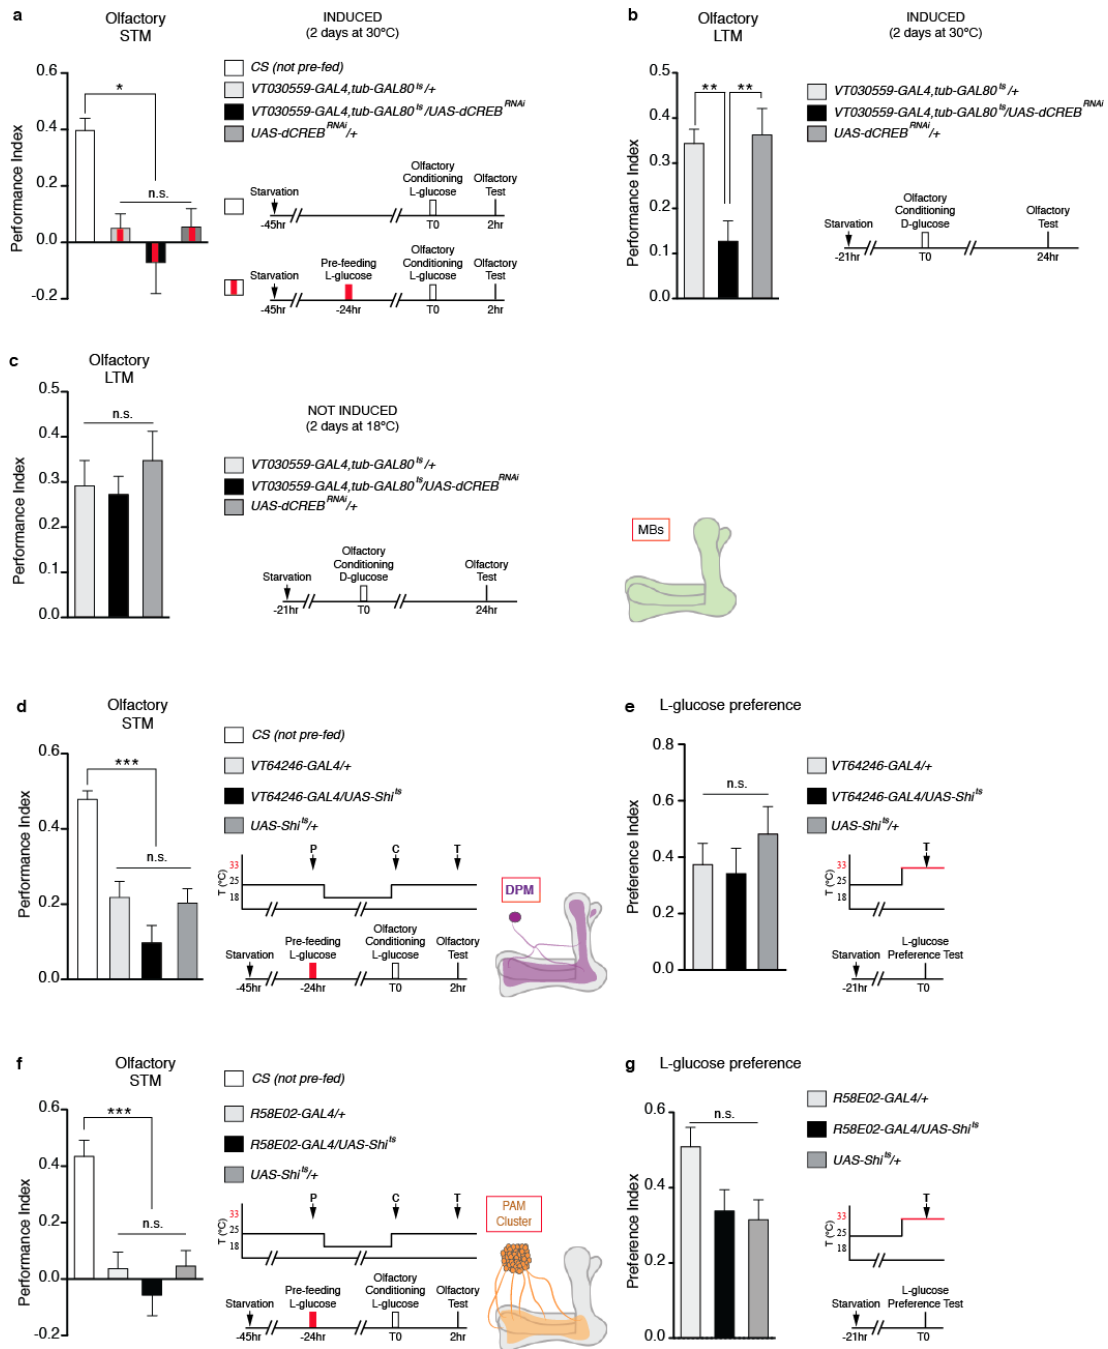

**Supplementary Figure 4. Experimental controls for CFM impairment by MB, DPM and PAM neuron blockade.** **a** CFM was not impaired by RNAi inhibition of dCREB in MBs of Adult flies conditioned with L-glucose ( $F_{(3,32)} = 5.542$ ;  $p = 0.039$ ;  $n \geq 6$ ;  $p = 0.658$  in *post-hoc* comparison between *VT030559-GAL4,tub-GAL80<sup>ts</sup>/+* and *VT030559-GAL4,tub-GAL80<sup>ts</sup>/UAS-dCREB<sup>RNAi</sup>/+*,  $p > 0.999$  in *post-hoc* comparison between *VT030559-GAL4,tub-GAL80<sup>ts</sup>/+* and *UAS-dCREB<sup>RNAi</sup>/+*,  $p = 0.632$  in *post-hoc* comparison between *VT030559-GAL4,tub-GAL80<sup>ts</sup>/UAS-dCREB<sup>RNAi</sup>/+* and *UAS-dCREB<sup>RNAi</sup>/+*). **b** LTM was impaired by RNAi inhibition of dCREB in MBs of adult flies conditioned with D-glucose ( $F_{(2,50)} = 8.166$ ;  $p < 0.001$ ;  $n \geq 17$ ). **c** After 2 days at 18°C, control *tub-GAL80<sup>ts</sup>/VT030559-GAL4/dCREB<sup>RNAi</sup>* flies displayed normal LTM ( $F_{(2,32)} = 0.487$ ,  $p = 0.618$ ,  $n \geq 10$ ). **d** *Shi<sup>ts</sup>* expression in DPM neurons with *VT64246-GAL4* control does not impair CFM ( $F_{(3,101)} = 0.290$ ;  $p < 0.001$ ;  $n \geq 19$ ;  $p = 0.221$  in *post-hoc* comparison between *VT64246-GAL4/+* and *VT64246-GAL4/UAS-Shi<sup>ts</sup>/+*,  $p = 0.992$  in *post-hoc* comparison between *VT64246-GAL4/+* and *UAS-Shi<sup>ts</sup>/+*,  $p = 0.144$  in *post-hoc* comparison between *VT64246-GAL4/UAS-Shi<sup>ts</sup>/+* and *UAS-Shi<sup>ts</sup>/+*). **e** At the restrictive temperature, the L-glucose response of flies expressing *Shi<sup>ts</sup>* in

DPM neurons does not differ from that of control genotypes ( $F_{(2,54)} = 0.686$ ;  $p > 0.05$ ;  $n \geq 17$ ). **f**  $Shi^{ts}$  expression in PAM neurons with R58E02-GAL4 control does not impair CFM ( $F_{(3,69)} = 8.589$ ;  $p < 0.001$ ;  $n \geq 11$ ;  $p = 0.685$  in *post-hoc* comparison between  $UAS-Shi^{ts}/+$  and  $R58E02-GAL4/UAS-Shi^{ts}$ ,  $p = 0.999$  in *post-hoc* comparison between  $R58E02-GAL4/+$  and  $UAS-Shi^{ts}/+$ ,  $p = 0.616$  in *post-hoc* comparison between  $R58E02-GAL4/UAS-Shi^{ts}$  and  $R58E02-GAL4/+$ ). **g** At the restrictive temperature, the L-glucose response of flies expressing  $Shi^{ts}$  in PAM neurons does not differ from that of control genotypes ( $F_{(2,49)} = 3.891$ ;  $p > 0.05$ ;  $n \geq 16$ ). Means are  $\pm$  SEM; statistical test: one-way ANOVA; n.s.:  $p \geq 0.05$ ; \*\*\* $p < 0.001$  in post hoc comparisons with both parental controls.

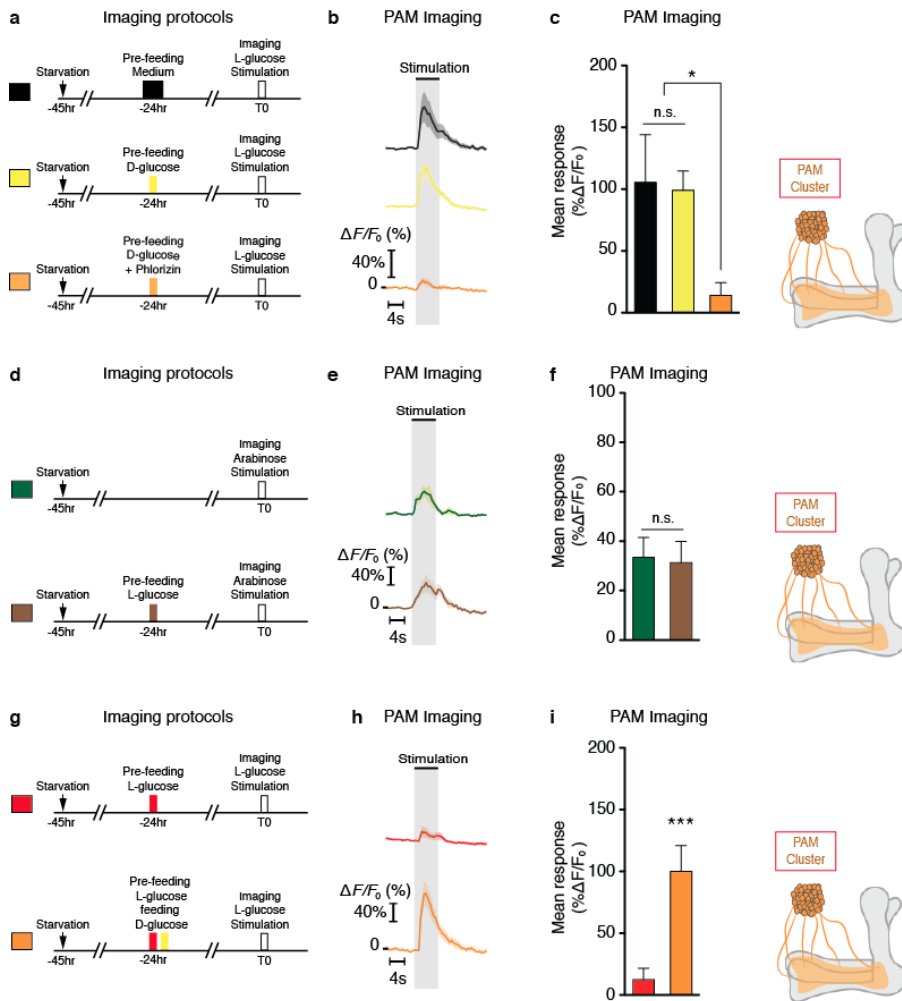

**Supplementary Figure 5. Additional experiments for PAM Imaging.** **a** Pre-feeding protocol used before the imaging experiment: flies were pre-fed with either classical medium for 30 min, D-glucose for 1 min, or a mixture of D-glucose and phlorizin 24 hr before L-glucose stimulation under the microscope. **b** Time course response of PAM neurons.  $n \geq 8$ . Black bar: stimulus presentation. **c** Average response to L-glucose. Flies pre-fed on a mixture of D-glucose and phlorizin displayed a significantly lower response in comparison to flies pre-fed on medium and D-glucose pre-fed flies ( $F_{(2,27)} = 5.783$ ;  $p = 0.008$ ;  $n \geq 8$ ;  $p = 0.978$  in *post-hoc* comparison between flies pre-fed with medium and flies pre-fed with D-glucose). **d** Pre-feeding protocol used before the imaging experiment: flies were pre-fed or not with L-glucose for 1 min, 24 hr before arabinose stimulation under the microscope. **e** Time course of response.  $n \geq 9$ . Black bar: stimulus presentation. **f** Average response to arabinose. Flies pre-fed on L-glucose displayed an equivalent response in comparison to non-pre-fed flies ( $t$ -test,  $t_{17} = 0.18$ ;  $p = 0.852$ ;  $n \geq 10$ ). **g** Pre-feeding protocol used before the imaging experiment: flies were pre-fed either L-glucose for 1 min or L-glucose for 1 min and immediately fed on D-glucose for 1 min, 24 hr before L-glucose stimulation under the microscope. **h** Time course response of PAM neurons.  $n \geq 8$ . Black bar: stimulus presentation. **i**, Average response to L-glucose. Flies pre-fed with L-glucose and re-fed on D-glucose displayed a significantly higher response in comparison to L-glucose pre-fed flies ( $t$ -test,  $t_{16} = 4.112$ ;  $p = 0.0008$ ;  $n \geq 8$ ). Means are  $\pm$  SEM; statistical test: one-way ANOVA; n.s.:  $p \geq 0.05$ ; \* $p < 0.05$ ; \*\*\* $p < 0.001$  in comparison between two groups.
